# Supplementary material for: Proteomic analysis of gemcitabine-resistant pancreatic cancer cells reveals that microtubule-associated protein 2 upregulation associates with taxane treatment
Source: PubMed Central journal article supplement — Ther Adv Med Oncol. 2019 May 10;11:1758835919841233. doi: 10.1177/1758835919841233 (PMC6535709; doi:10.1177/1758835919841233), 2019-05-10

Supplemental Figure 5  
Representative sequential ultrasound tumour volume evaluation

Vehicle treatment

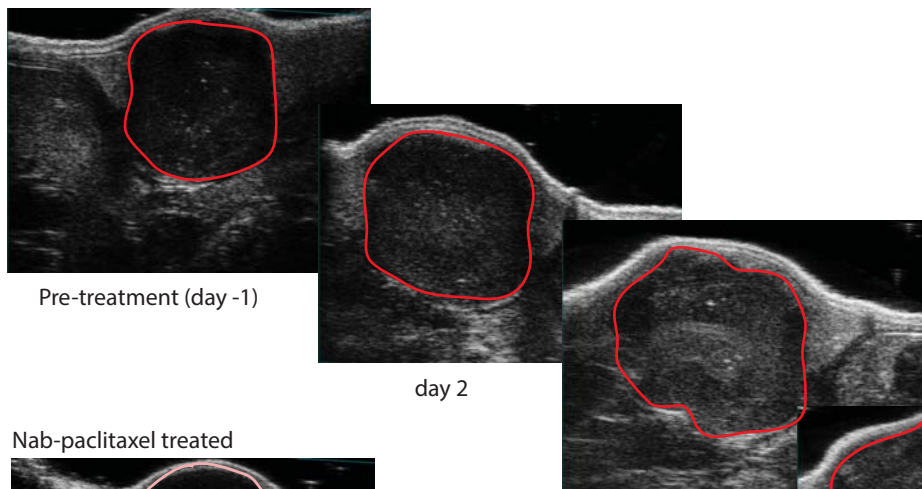

Nab-paclitaxel treated

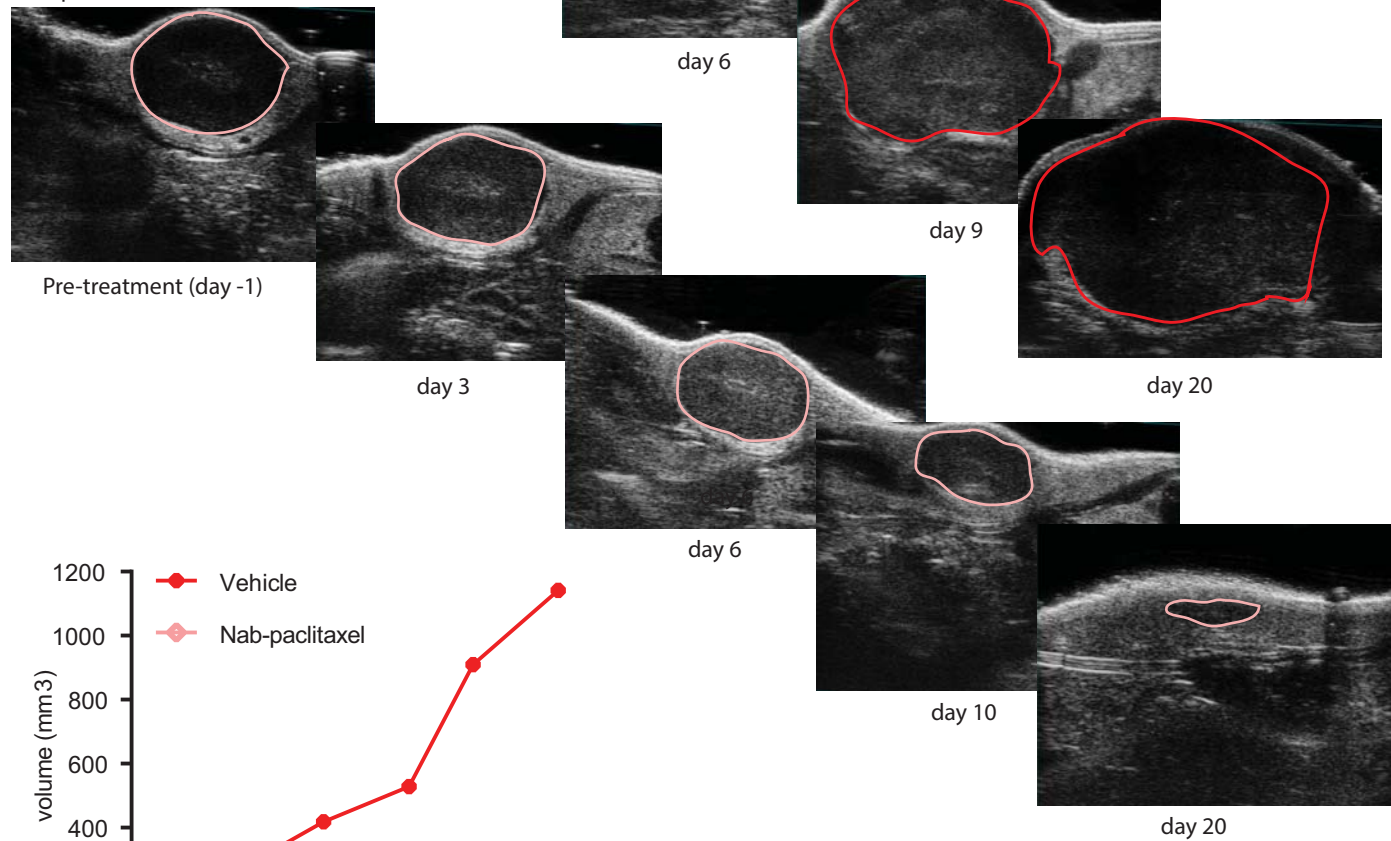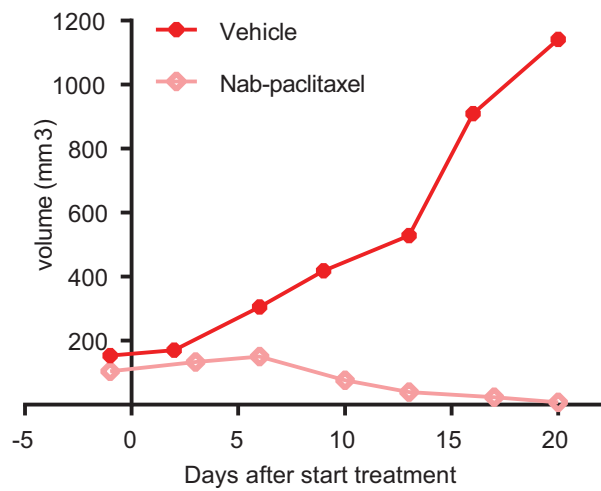

Supplement: suppl_fig5_.pdf [file suppl_fig5_.pdf]
