# Supplementary material for: Proteomic analysis of gemcitabine-resistant pancreatic cancer cells reveals that microtubule-associated protein 2 upregulation associates with taxane treatment
Source: PubMed Central journal article supplement — Ther Adv Med Oncol. 2019 May 10;11:1758835919841233. doi: 10.1177/1758835919841233 (PMC6535709; doi:10.1177/1758835919841233), 2019-05-10
Supplement: Supplemental_table_2.pdf [file Supplemental_table_2.pdf]

Supplementary table 2

| Gemcitabine pathway modulators |                                                             |                                 |       |       |        |        |       |         |
|--------------------------------|-------------------------------------------------------------|---------------------------------|-------|-------|--------|--------|-------|---------|
| Gene name                      | Protein name                                                | Function in gemcitabine pathway | PANC1 | PANC1 | PANC1R | PANC1R | FC    | P-value |
| SLC29A1                        | Equilibrative nucleoside transporter 1                      | membrane transporter            | 10.4  | 10.3  | 6.8    | 6.9    | -1.51 | 0.242   |
| RRM1                           | Ribonucleoside-diphosphate reductase large subunit          | gemcitabine target              | 25.6  | 30.0  | 37.9   | 32.6   | 1.27  | 0.186   |
| RRM2                           | Ribonucleoside-diphosphate reductase subunit M2             | gemcitabine target              | 7.6   | 17.6  | 14.6   | 12.8   | 1.09  | 0.701   |
| NT5C                           | 5(3')-deoxyribonucleotidase, cytosolic type                 | gemcitabine dephosphorylation   | 5.7   | 2.1   | 5.8    | 11.9   | 2.28  | 0.094   |
| DCTD                           | Deoxycytidylate deaminase                                   | gemcitabine deactivation        | 11.4  | 12.4  | 13.6   | 15.8   | 1.24  | 0.447   |
| CMPK1                          | UMP-CMP kinase                                              | Gemcitabine activation          | 13.3  | 12.4  | 16.5   | 14.8   | 1.22  | 0.464   |
| RRM2B                          | Ribonucleoside-diphosphate reductase subunit M2 B           | gemcitabine target              | 4.7   | 4.1   | 3.9    | 3.0    | -1.29 | 0.617   |
| Transporters                   |                                                             |                                 |       |       |        |        |       |         |
| Gene name                      | Protein name                                                |                                 | PANC1 | PANC1 | PANC1R | PANC1R | FC    | P-value |
| SLC5A3                         | Sodium/myo-inositol cotransporter                           |                                 | 0.0   | 0.0   | 2.9    | 2.0    | NA    | 0.011   |
| SLC25A5                        | ADP/ATP translocase 2                                       |                                 | 76.7  | 58.9  | 49.6   | 49.4   | -1.37 | 0.037   |
| SLC7A6                         | Y+L amino acid transporter 2                                |                                 | 0.9   | 2.1   | 0.0    | 0.0    | NA    | 0.043   |
| SLC4A2                         | Anion exchange protein 2                                    |                                 | 6.6   | 6.2   | 11.7   | 13.8   | 1.99  | 0.045   |
| CACNA2D1                       | Voltage-dependent calcium channel subunit alpha-2/delta-1   |                                 | 5.7   | 1.0   | 6.8    | 9.9    | 2.49  | 0.068   |
| ABCC1                          | Multidrug resistance-associated protein 1                   |                                 | 50.2  | 36.2  | 53.5   | 59.3   | 1.31  | 0.083   |
| SLC12A4                        | Solute carrier family 12 member 4                           |                                 | 1.9   | 1.0   | 3.9    | 4.9    | 3.02  | 0.088   |
| MTCH2                          | Mitochondrial carrier homolog 2                             |                                 | 13.3  | 14.5  | 21.4   | 20.8   | 1.52  | 0.090   |
| SLC25A29                       | Mitochondrial basic amino acids transporter                 |                                 | 0.9   | 1.0   | 0.0    | 0.0    | NA    | 0.095   |
| SLC4A11                        | Sodium bicarbonate transporter-like protein 11              |                                 | 0.9   | 1.0   | 0.0    | 0.0    | NA    | 0.095   |
| SLC39A14                       | Zinc transporter ZIP14                                      |                                 | 3.8   | 1.0   | 6.8    | 4.9    | 2.44  | 0.096   |
| SLC12A2                        | Solute carrier family 12 member 2                           |                                 | 5.7   | 0.0   | 9.7    | 5.9    | 2.75  | 0.097   |
| Stem cell marker               |                                                             |                                 |       |       |        |        |       |         |
| Gene name                      | Protein name                                                |                                 | PANC1 | PANC1 | PANC1R | PANC1R | FC    | P-value |
| NES                            | Nestin                                                      |                                 | 2.8   | 4.1   | 22.4   | 21.7   | 6.33  | 0.001   |
| LTBP2                          | Latent-transforming growth factor beta-binding protein 2    |                                 | 4.7   | 3.1   | 0.0    | 0.0    | NA    | 0.004   |
| PAFAH1B1                       | Platelet-activating factor acetylhydrolase IB subunit alpha |                                 | 13.3  | 15.5  | 26.3   | 26.7   | 1.84  | 0.013   |
| LRP5                           | Low-density lipoprotein receptor-related protein 5          |                                 | 0.0   | 0.0   | 4.9    | 1.0    | NA    | 0.026   |
| NKAP                           | NF-kappa-B-activating protein                               |                                 | 0.9   | 2.1   | 0.0    | 0.0    | NA    | 0.043   |
| NF2                            | Merlin                                                      |                                 | 4.7   | 6.2   | 2.9    | 1.0    | -2.80 | 0.071   |
| FBLN1                          | Fibulin-1                                                   |                                 | 0.9   | 1.0   | 0.0    | 0.0    | NA    | 0.095   |
