# Supplementary figures and images for: Proteomic analysis of gemcitabine-resistant pancreatic cancer cells reveals that microtubule-associated protein 2 upregulation associates with taxane treatment
Source: PubMed Central journal article supplement — Ther Adv Med Oncol. 2019 May 10;11:1758835919841233. doi: 10.1177/1758835919841233 (PMC6535709; doi:10.1177/1758835919841233), 2019-05-10

Supplemental Figure 4

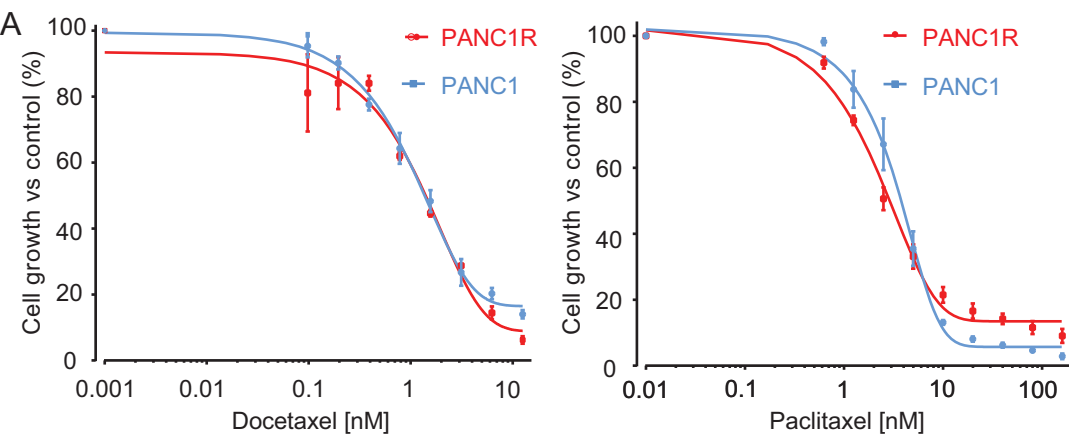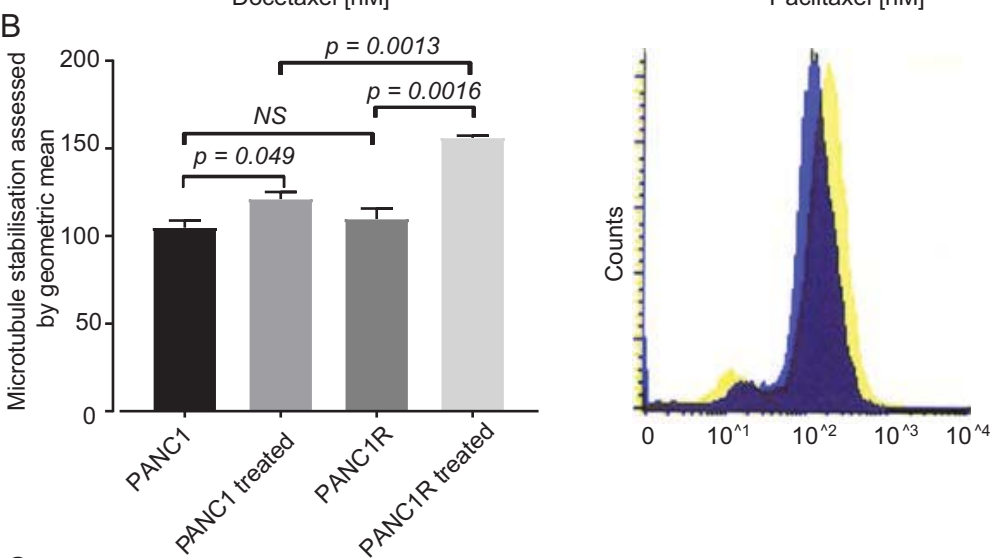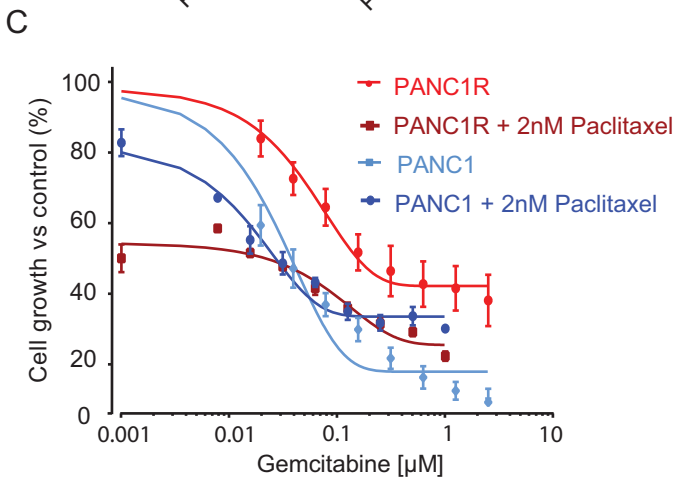

Supplement: suppl_fig4_.pdf [file suppl_fig4_.pdf]

# Supplemental Figure 1

A

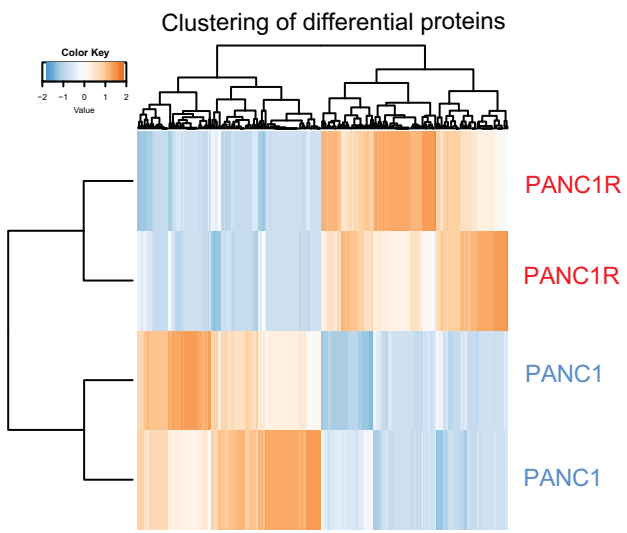

B

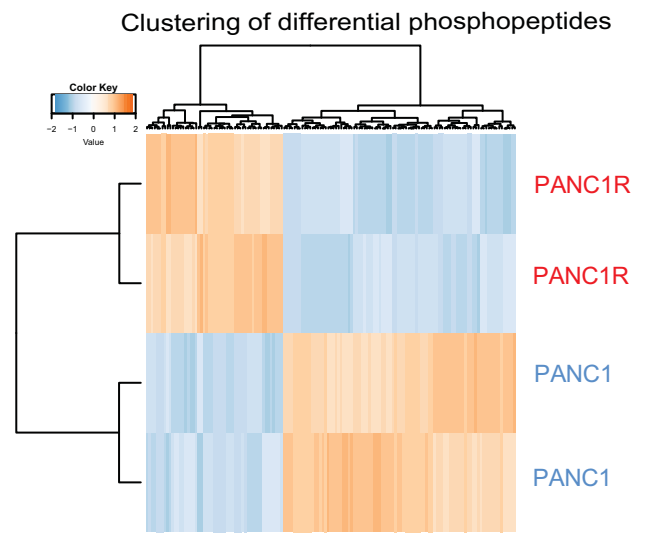

Supplement: suppl_fig_1_10-12-2018.pdf [file suppl_fig_1_10-12-2018.pdf]

Supplemental figure 6

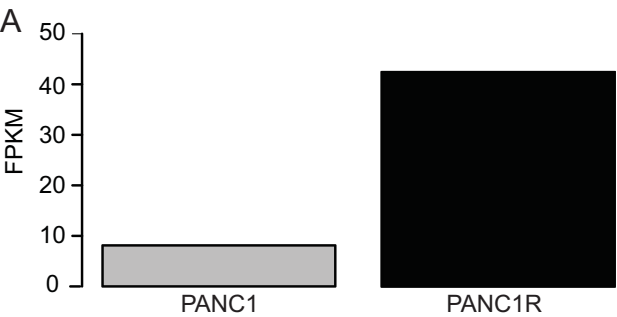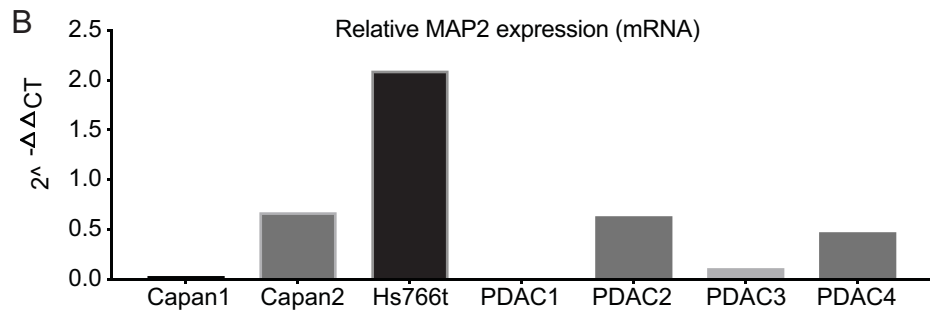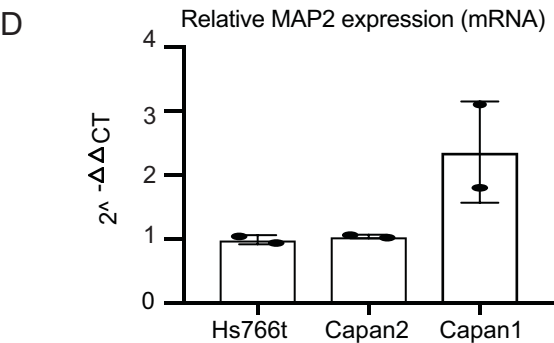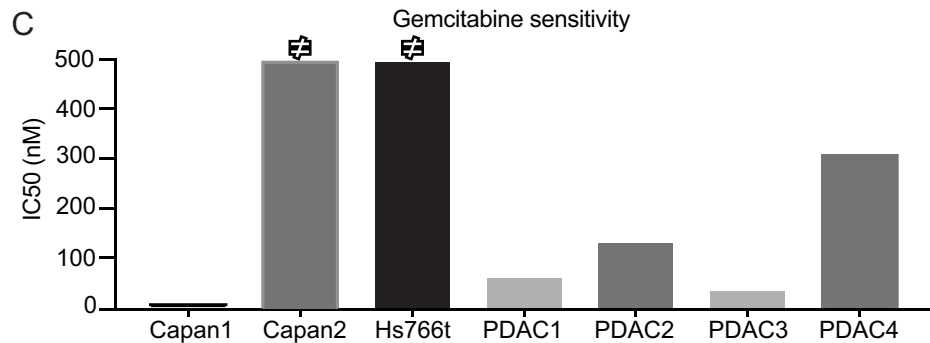

Supplement: suppl_fig_6.pdf [file suppl_fig_6.pdf]
